# Supplementary material for: Optical absorption of warped nanographenes tuned by five- and seven-membered carbon rings
Source: Royal Society of Chemistry journal article supplement (doi:10.1039/c5cp02372f), 2015-01-01
Supplement: c5cp02372f1.pdf [file c5cp02372f1.pdf]

## **Optical absorption of warped nanographenes tuned by five- and seven-membered carbon rings**

Xinqin Wang,<sup>a</sup> Shengping Yu,<sup>b</sup> Zhaoyang Lou,<sup>a</sup> Qun Zeng,<sup>a</sup> and Mingli Yang<sup>\*a</sup>

<sup>a</sup> Institute of Atomic and Molecular Physics, Key Laboratory of High Energy Density Physics and Technology of Ministry of Education, Sichuan University, Chengdu 610065, P. R. China

<sup>b</sup> College of Chemistry and Environment Protection Engineering, Southwest University for Nationalities, Chengdu 610041, P. R. China

**Table S1** The HOMO, LUMO energy levels and their gaps (in eV) calculated with B3LYP/def-TZVP.

**Table S2** Compositions of HOMO to LUMO transitions.

**Fig. S1** Optimized structure of  $C_{80}H_{30}$ . Values in red are the dihedral angles (in degree) of the structure obtained with B3LYP/def-TZVP.

**Fig. S2** Projected density of states (PDOS) of  $C_{80}H_{30}$  and  $C_{78}H_{80}$ .

**Fig. S3** The UV/Vis absorption spectra of  $C_{80}H_{30}$  calculated with various functionals of B3LYP, Cam-B3LYP, PBE, PBE0, M06-2X and TPSSh.

**Fig. S4** HOMO and LUMO orbitals of **a–e**.

**Fig. S5** HOMO and LUMO orbitals of **a'–e'**.

**Fig. S6** HOMO and LUMO contours of the model molecules shown in Fig. 4.

**Table S1** The HOMO, LUMO energy levels and their gaps (in eV) calculated with B3LYP/def-TZVP.

|                                 | HOMO   | LUMO   | Gaps  |            | HOMO   | LUMO   | Gaps  |
|---------------------------------|--------|--------|-------|------------|--------|--------|-------|
| C <sub>80</sub> H <sub>30</sub> | -5.336 | -2.329 | 3.007 |            |        |        |       |
| C <sub>78</sub> H <sub>30</sub> | -5.168 | -2.263 | 2.905 |            |        |        |       |
| <b>a</b>                        | -5.276 | -2.406 | 2.870 | <b>a'</b>  | -5.355 | -2.396 | 2.959 |
| <b>b1</b>                       | -5.256 | -2.429 | 2.827 | <b>b1'</b> | -5.221 | -2.332 | 2.889 |
| <b>b2</b>                       | -5.214 | -2.402 | 2.812 | <b>b2'</b> | -5.363 | -2.393 | 2.970 |
| <b>c</b>                        | -5.327 | -2.496 | 2.830 | <b>c'</b>  | -5.416 | -2.410 | 3.005 |
| <b>d</b>                        | -5.250 | -2.454 | 2.795 | <b>d'</b>  | -5.338 | -2.365 | 2.973 |
| <b>e</b>                        | -5.398 | -2.513 | 2.884 | <b>e'</b>  | -5.500 | -2.408 | 3.093 |

**Table S2** Compositions of HOMO to LUMO transitions.

|                                     | $\alpha$  |          | $\beta$   |          | $\gamma$  |          |
|-------------------------------------|-----------|----------|-----------|----------|-----------|----------|
| <b>C<sub>80</sub>H<sub>30</sub></b> | 485.56nm  | f=0.1772 | 435.53nm  | f=0.5851 | 335.72nm  | f=0.2725 |
| HOMO:255                            | 254 → 257 | 0.192    | 252 → 256 | -0.206   | 249 → 257 | -0.114   |
| LUMO:256                            | 255 → 256 | 0.668    | 253 → 256 | -0.195   | 252 → 258 | -0.148   |
|                                     | 254 → 256 | 0.366    | 253 → 259 | -0.396   |           |          |
|                                     | 255 → 257 | 0.507    | 255 → 260 | -0.101   |           |          |
|                                     | 255 → 261 | -0.105   |           |          |           |          |
|                                     | 255 → 263 | 0.431    |           |          |           |          |
|                                     | 255 → 265 | -0.105   |           |          |           |          |
| <b>C<sub>78</sub>H<sub>30</sub></b> | 443.16nm  | f=1.8478 | 443.16nm  | f=1.8478 | 298.22nm  | f=0.1942 |
| HOMO:249                            | 248 → 250 | 0.339    | 248 → 250 | 0.339    | 244 → 254 | 0.119    |
| LUMO:250                            | 248 → 251 | 0.363    | 248 → 251 | 0.363    | 247 → 253 | 0.354    |
|                                     | 249 → 250 | 0.360    | 249 → 250 | 0.360    | 248 → 261 | 0.160    |
|                                     | 249 → 251 | -0.339   | 249 → 251 | -0.339   | 248 → 262 | 0.338    |
|                                     | 248 → 263 | -0.155   |           |          |           |          |
|                                     | 249 → 261 | 0.349    |           |          |           |          |
|                                     | 249 → 262 | -0.163   |           |          |           |          |
| <b>a</b>                            | 514.02nm  | f=0.1315 | 458.77nm  | f=0.6236 | 389.45nm  | f=0.1076 |
| HOMO:248                            | 246 → 249 | -0.108   | 246 → 249 | 0.171    | 241 → 249 | -0.174   |
| LUMO:249                            | 247 → 250 | 0.242    | 247 → 249 | 0.433    | 242 → 249 | -0.352   |
|                                     | 248 → 249 | 0.636    | 248 → 250 | 0.509    | 243 → 249 | -0.229   |
|                                     | 244 → 250 | 0.424    |           |          |           |          |
|                                     | 247 → 251 | 0.121    |           |          |           |          |
|                                     | 247 → 253 | -0.111   |           |          |           |          |
|                                     | 248 → 252 | 0.130    |           |          |           |          |
| <b>b1</b>                           | 522.13nm  | f=0.0657 | 464.41nm  | f=0.5894 | 351.26nm  | f=0.1434 |
| HOMO:241                            | 240 → 242 | 0.225    | 238 → 242 | -0.268   | 234 → 242 | -0.100   |
| LUMO:242                            | 240 → 243 | 0.255    | 238 → 243 | 0.125    | 238 → 244 | -0.112   |
|                                     | 241 → 242 | 0.569    | 239 → 242 | -0.111   | 238 → 245 | -0.125   |
|                                     | 241 → 243 | -0.209   | 240 → 242 | 0.378    | 239 → 244 | -0.276   |
|                                     | 241 → 243 | 0.475    | 239 → 247 | 0.100    |           |          |
|                                     | 240 → 246 | -0.139   |           |          |           |          |
|                                     | 240 → 248 | 0.260    |           |          |           |          |
|                                     | 241 → 246 | -0.228   |           |          |           |          |
|                                     | 241 → 248 | 0.380    |           |          |           |          |
|                                     | 241 → 249 | -0.124   |           |          |           |          |
| <b>b2</b>                           | 518.76nm  | f=0.2384 | 456.17nm  | f=0.5224 | 389.37nm  | f=0.0970 |
| HOMO:241                            | 240 → 243 | -0.182   | 240 → 242 | -0.471   | 236 → 242 | 0.514    |
| LUMO:242                            | 241 → 242 | 0.669    | 241 → 243 | 0.491    | 237 → 243 | 0.103    |
|                                     | 241 → 244 | 0.137    |           |          |           |          |
|                                     | 241 → 245 | 0.392    |           |          |           |          |

|            |           |          |           |          |           |          |
|------------|-----------|----------|-----------|----------|-----------|----------|
|            | 241 → 249 | -0.105   |           |          |           |          |
| <b>c</b>   | 524.38nm  | f=0.1027 | 454.04nm  | f=0.7295 | 395.05nm  | f=0.1126 |
| HOMO:234   | 232 → 235 | -0.161   | 231 → 236 | 0.186    | 230 → 235 | 0.599    |
| LUMO:235   | 233 → 236 | -0.303   | 232 → 235 | 0.104    | 232 → 236 | -0.213   |
|            | 234 → 235 | 0.611    | 233 → 236 | 0.579    | 233 → 238 | 0.250    |
|            | 234 → 235 | 0.319    |           |          |           |          |
| <b>d</b>   | 531.04nm  | f=0.0307 | 458.19nm  | f=0.5001 | 389.91nm  | f=0.1008 |
| HOMO:227   | 226 → 228 | -0.225   | 224 → 228 | 0.370    | 223 → 228 | 0.236    |
| LUMO:228   | 226 → 229 | -0.317   | 224 → 229 | -0.369   | 223 → 229 | 0.461    |
|            | 227 → 228 | 0.501    | 226 → 228 | -0.301   | 225 → 230 | -0.109   |
|            | 227 → 229 | -0.288   | 226 → 229 | 0.161    | 226 → 230 | 0.198    |
|            | 227 → 228 | 0.136    | 227 → 232 | -0.348   |           |          |
|            | 227 → 229 | 0.245    |           |          |           |          |
| <b>e</b>   | 454.53nm  | f=1.0727 | 454.53nm  | f=1.0727 | 339.36nm  | f=0.5165 |
| HOMO:220   | 219 → 221 | 0.316    | 219 → 221 | 0.316    | 214 → 221 | -0.116   |
| LUMO:221   | 219 → 222 | 0.375    | 219 → 222 | 0.375    | 215 → 222 | -0.111   |
|            | 220 → 221 | -0.373   | 220 → 221 | -0.373   | 217 → 223 | 0.319    |
|            | 220 → 222 | 0.317    | 220 → 222 | 0.317    | 218 → 224 | 0.488    |
|            | 219 → 225 | 0.208    |           |          |           |          |
|            | 220 → 226 | 0.220    |           |          |           |          |
| <b>a'</b>  | 492.35nm  | f=0.1948 | 432.78nm  | f=0.4404 | 344.76nm  | f=0.1990 |
| HOMO:256   | 255 → 258 | -0.112   | 253 → 257 | 0.135    | 248 → 258 | 0.104    |
| LUMO:257   | 256 → 257 | 0.680    | 254 → 257 | -0.151   | 253 → 259 | 0.250    |
|            | 255 → 257 | -0.235   | 253 → 260 | 0.478    |           |          |
|            | 255 → 258 | 0.135    | 254 → 259 | 0.240    |           |          |
|            | 256 → 258 | 0.601    | 254 → 261 | 0.143    |           |          |
|            | 256 → 262 | -0.210   |           |          |           |          |
|            | 256 → 263 | 0.111    |           |          |           |          |
| <b>b1'</b> | 504.94nm  | f=0.1879 | 454.06nm  | f=0.2423 | 422.49nm  | f=0.2540 |
| HOMO:257   | 256 → 259 | 0.121    | 254 → 258 | -0.156   | 254 → 258 | -0.378   |
| LUMO:258   | 257 → 258 | 0.683    | 255 → 258 | -0.193   | 255 → 259 | 0.341    |
|            | 256 → 258 | 0.493    | 256 → 259 | 0.428    |           |          |
|            | 257 → 259 | 0.326    | 257 → 259 | -0.126   |           |          |
|            | 257 → 260 | -0.256   |           |          |           |          |
| <b>b2'</b> | 489.51nm  | f=0.2493 | 436.17nm  | f=0.3371 | 414.71nm  | f=0.3319 |
| HOMO:257   | 257 → 258 | 0.688    | 255 → 258 | -0.229   | 255 → 258 | 0.140    |
| LUMO:258   | 256 → 258 | -0.225   | 256 → 259 | 0.647    |           |          |
|            | 256 → 259 | 0.142    | 257 → 259 | -0.114   |           |          |
|            | 257 → 259 | 0.593    |           |          |           |          |
| <b>c'</b>  | 495.29nm  | f=0.0346 | 412.12nm  | f=0.3581 | 383.56nm  | f=0.2260 |
| HOMO:258   | 256 → 259 | 0.162    | 255 → 259 | 0.222    | 252 → 259 | 0.317    |
| LUMO:259   | 257 → 259 | 0.359    | 257 → 260 | 0.594    | 254 → 259 | 0.153    |
|            | 258 → 259 | 0.573    | 258 → 260 | -0.180   | 255 → 260 | 0.121    |
|            | 258 → 261 | 0.126    | 256 → 260 | 0.183    |           |          |

|           |           |          |           |          |           |          |
|-----------|-----------|----------|-----------|----------|-----------|----------|
|           | 257 → 261 | 0.210    |           |          |           |          |
|           | 258 → 261 | 0.482    |           |          |           |          |
| <b>d'</b> | 499.15nm  | f=0.0650 | 432.12nm  | f=0.3956 | 373.16nm  | f=0.1807 |
| HOMO:259  | 258 → 261 | 0.207    | 256 → 260 | 0.278    | 253 → 260 | 0.409    |
| LUMO:260  | 259 → 260 | 0.648    | 257 → 260 | 0.194    | 254 → 260 | -0.234   |
|           | 259 → 261 | 0.156    | 257 → 261 | 0.359    | 255 → 260 | 0.131    |
|           | 258 → 260 | 0.133    | 255 → 261 | 0.117    |           |          |
|           | 258 → 261 | -0.337   | 257 → 262 | 0.417    |           |          |
|           | 259 → 261 | 0.166    |           |          |           |          |
|           | 259 → 262 | -0.263   |           |          |           |          |
| <b>e'</b> | 445.2nm   | f=0.1954 | 426.39nm  | f=0.5049 | 366.25nm  | f=0.2194 |
| HOMO:260  | 257 → 261 | -0.281   | 257 → 261 | 0.416    | 251 → 261 | 0.524    |
| LUMO:261  | 257 → 262 | -0.116   | 258 → 262 | 0.388    | 253 → 261 | 0.146    |
|           | 258 → 261 | -0.249   | 258 → 263 | -0.110   | 255 → 262 | -0.138   |
|           | 258 → 262 | 0.408    | 259 → 262 | -0.323   | 257 → 263 | 0.177    |
|           | 259 → 261 | 0.154    | 260 → 262 | 0.175    | 258 → 263 | 0.224    |
|           | 260 → 262 | -0.359   | 258 → 264 | 0.109    |           |          |
|           | 259 → 263 | -0.106   |           |          |           |          |
|           | 260 → 263 | -0.138   |           |          |           |          |

---

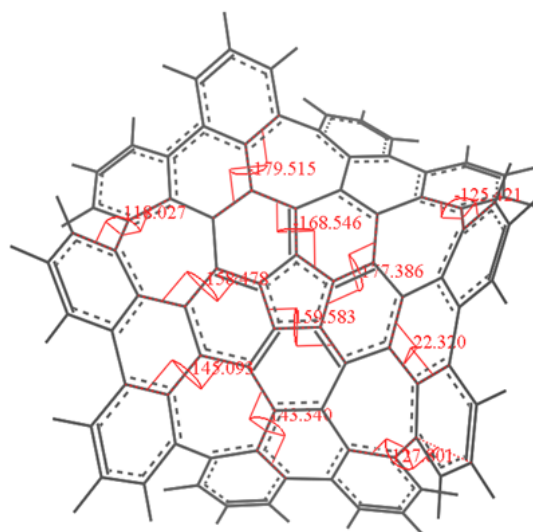

**Fig. S1** Optimized structure of C<sub>80</sub>H<sub>30</sub>. Values in red are the dihedral angles (in degree) of the structure obtained with B3LYP/def-TZVP.

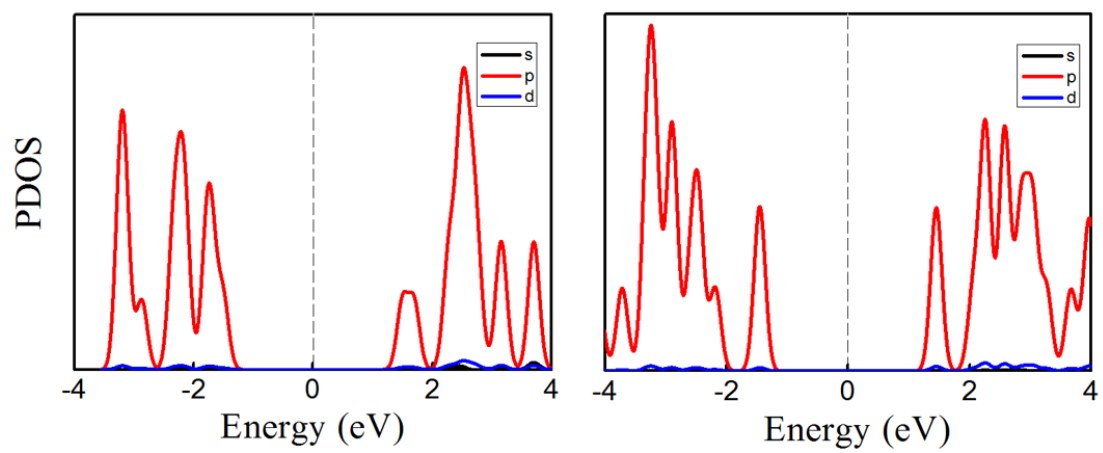

**Fig. S2** Projected density of states (PDOS) of  $C_{80}H_{30}$  and  $C_{78}H_{80}$ .



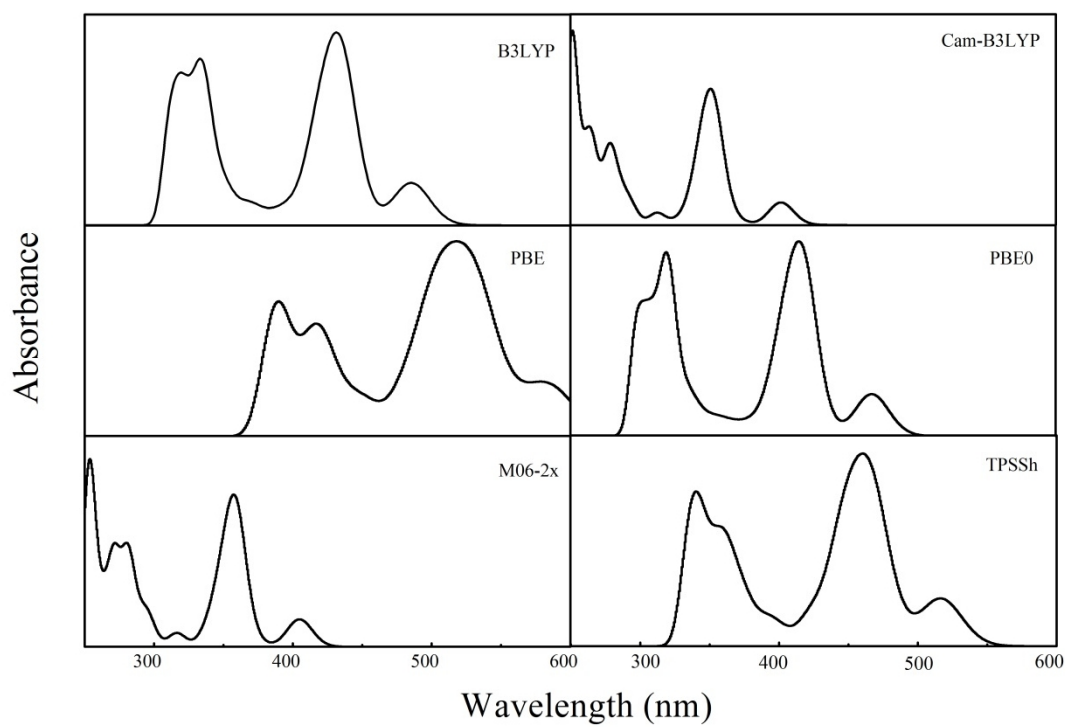

**Fig. S3** The UV/Vis absorption spectra of  $C_{80}H_{30}$  calculated with various functionals of B3LYP, Cam-B3LYP, PBE, PBE0, M06-2X and TPSSh.

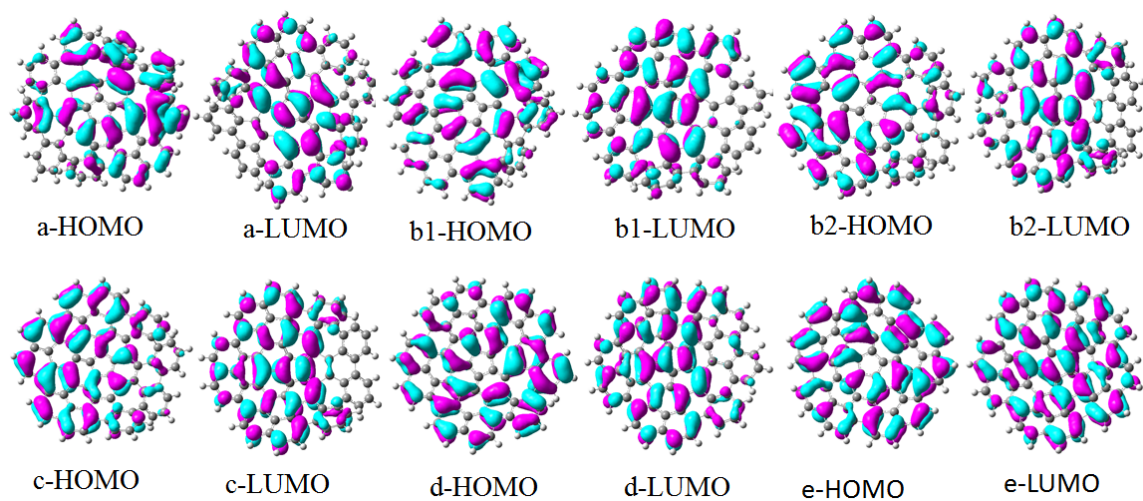

**Fig. S4** HOMO and LUMO orbitals of **a–e**.

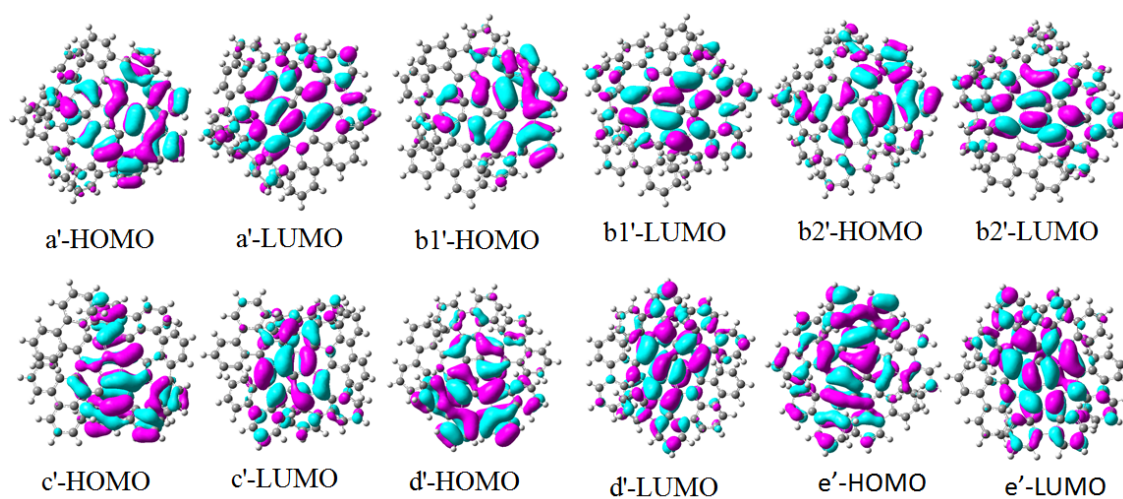

**Fig. S5** HOMO and LUMO orbitals of **a'–e'**.

**Model I.**

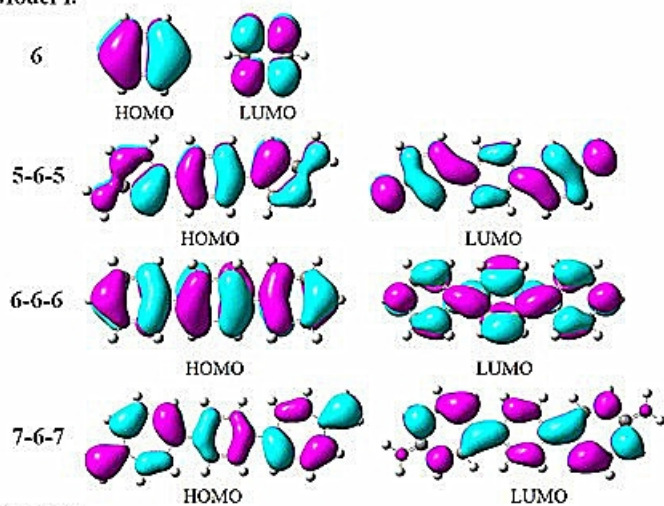

**Model II.**

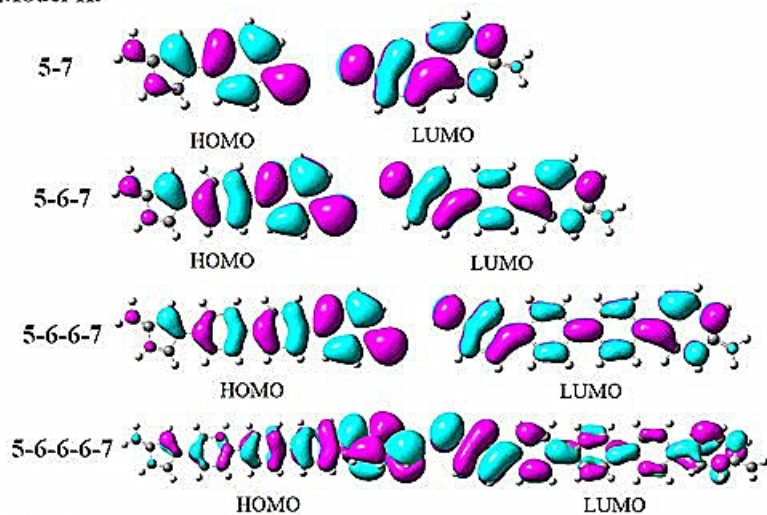

**Model III.**

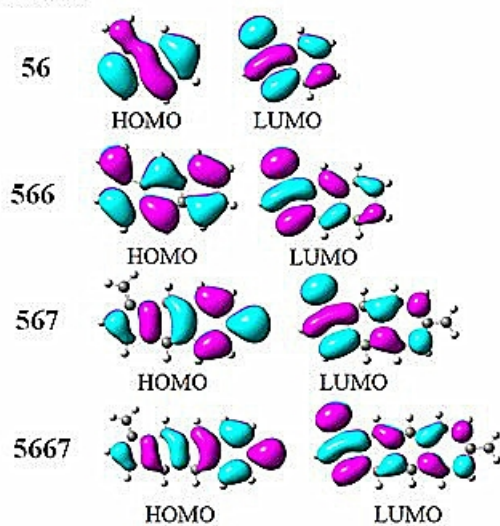

**Fig. S6** HOMO and LUMO contours of the model molecules shown in Fig. 4.
